# Supplementary material for: Lung Dysfunction and Systemic Inflammation: A Role for HO-1 and NLRP3 in a COVID-19 Murine Model
Source: Research Square preprint supplement (doi:10.21203/rs.3.rs-8844647/v1), 2026-03-17
Supplement: Supplementary file 1 [file 1bb43f5c3d777c6b718e3042.docx]

**Supplemental Methods**

**Cohort:**

N=30 male *K18-hACE2* mice (Strain B6.Cg-Tg(K18-ACE2)2Prlmn/J, Jackson Labs) were used for pulmonary and biomarker assessment. N=15 received oropharyngeal aspiration of control buffer (provided by Raybiotech), and N=15 received equivalent volume of C19 spike protein.

Exclusion criteria were applied on N=13 mice (Control N=6, C19 N=7) for being underweight, sick at baseline, or improper technique on aspiration, Flexivent, or collection procedure, **Supplemental Table 1**. We also excluded N=5 mice (Control N=2, C19 N=3) mice only from Flexivent measures for undersedation or incorrect Flexivent techniques (such as nebulizer disconnected, suture placed below tubing adaptor), but plasma and BAL samples were kept for biomarker assessment.

**Lung Mechanics:**

Briefly, inspiratory capacity (IC) was obtained by deep inflation to 5cmH2O for 6 seconds, and resistance (Rs), compliance (Crs) and elastance (Ers) of the upper airway respiratory system were measured in the snapshot-150 maneuver (single frequency perturbation of 2.5Hz); Newtonian resistance (Rn), Tissue Damping (G), Tissue Elastance (H) were obtained during the QuickPrime-3 maneuver (8s, 0.5–19.6Hz) and fit to a constant phase model of respiratory mechanics; lung pressure-volume loop shape parameters A, K, and quasi-static compliance Cst were also obtained using PV-loop. A negative pressure-driven forced expiratory (NPFE) maneuver was used to approximate forced expiratory volume in 0.1 second (FEV0.1) and forced vital capacity (FVC). Baseline measurements were assessed three times and averaged per mouse before performing the methacholine challenge. Values with insufficient coefficient of determination (COD) of the mathematical model provided by Flexivent software were excluded. Mice with extreme outliers of expected values due to undersedation, poor surgical technique, or similar reasons were also excluded.

*Methacholine Challenge:*Saline was nebulized (fine mist ultrasonic nebulizer; Aerogen) for 10 seconds as a control followed by 10 repeat lung parameter measurements. Increasing concentrations of methacholine(Santa Cruz, 0, 6.25, 12.5, 25, 50, 100, 200mg/ml) were similarly nebulized followed by 10 repeated lung parameter measurements, and the maximum resistance (Rrs) was selected for each dose.Responsivenesswas expressed as the provocative concentration of methacholinerequired to induce a doubling of Rrs (PC200), calculated by interpolation as previously described.1-4

**Sample Collection.** Immediately after lung mechanics were obtained, lungs were lavaged with 1mL of cold phosphate buffered saline twice. Then mice received cardiac puncture with a 20g needle loaded with 10uL of heparin (100U/mL). *Plasma* was obtained by centrifugation at 1500rpm for 15 minutes (Sorvall), aliquoted, and stored at -80°C. 200uL of the *bronchoalveolar lavage (BAL)* was mounted on histology slides (Cytospin) and stained with Giemsa-Wright (Sigma). 10uL was used for cell counts on a hemocytometer. Remaining BAL was centrifuged at 1500rpm for 15 minutes (Sorvall). Mice exsanguinated with IVC transection, and heart was slowly infused with at least 3-5cc of saline until IVC effluent was clear. The *right lung* was ligated and snap frozen. The *left lung* was inflated to 20mmHg with 4% paraformaldehyde, sectioned, and stained by H&E.

**Evan’s blue (EB).** Dedicated mice were used for EB study, with n=7 / group of C19 vs control exposure. 72 hours after exposure, mice received ip 160mg of 2% Evans Blue (EB) dye in sterile PBS per kg of mouse.5,6 One hour later mice received ip anesthesia (mixture of ketamine (100 mg/ml, Troy Laboratories) and xylazine (10 mg/ ml, Troy Laboratories)) until absence of reflex. Cardiac punctures were collected from each mouse and plasma was obtained as previously described. IVC was transected and intracardiac infusion of saline was performed. Both lungs were collected and snap frozen. A portion of the snap frozen lung was homogenized with 2mL of formamide and incubated at 50°C for 24 hours.7 Sample was centrifuged for 1 minute at 13200rpm (Eppendorf 5415D) and supernatant was assayed for extracted EB by spectrophotometric absorbance at 620 and 740 nm wavelength (Nanodrop), and corrected for heme using the following calculation:

*e*620 corrected = *e*620 − [(1*.*426 × *e*740) + 0*.*03]

Plasma samples were assayed for EB on the same instrument and corrected for heme with the same formula. BAL and plasma were assayed on a 68-multiplex assay for inflammation (Millipore Sigma, Burlington, MA).

**Immunoblots.** A portion of the right lung was lysed in NP-40 lysis buffer, composed of 1% NP-40 (Sigma), 20% Glycerol (Santa Cruz®), 0.2 mM EDTA (Sigma), 40 mM HEPES (Gibco, USA) pH 7.9, 0.5 M NaF (Sigma), 10 mM NaPpi (Sigma), 5 M NaCl (Fisher) and was supplemented with protease inhibitor cocktail (aprotinin, leupeptin, and pepstatin in a 1:1:1 ratio; Sigma), 0.5 M dithiothreitol (Sigma), 10 mg/mL phenylmethanesulfonyl fluoride (Sigma, USA) and 100 mM Na3VO4 (Sigma). Debris was removed by centrifugation (Sorvall) at 1500 rpm for 15 min, and proteins were fractionated ProteinSimple, USA), and probed for NLRP-3 (Abcam AB 263899) and beta-actin (Millipore Sigma, A2228).

**Statistical Analysis.** Data determined as normally distributed based on Gaussian

***Semi-supervised hierarchical clustering*** was performed in R (version 4.4.2, packages: BiocManager, ComplexHeatmap, circlize) with data centered, scaled by unit variance and segregated by exposure. Manhattan distance was selected for the high-dimensional and non-parametric nature of our data.8 For clustering analysis on the 32-multiplex biomarker data determined from plasma, n=3 values for IL-9 and n=2 for IL-1α had missing data (<2% of all assayed analytes) from technical issues such as bead count, and were imputed using missMDA package in R.9

***Principal component analysis*** (PCA) was used for feature projection/data visualization of mean-centered, normalized attributes and performed in R (Packages: ggbiplot and rgl).

**Ingenuity Pathway Analysis (IPA)**: Analytes were imported into IPA (Qiagen version 2025). The input dataset consisted of the analyte identifiers (Entrez Gene Identifiers), fold change, and corresponding p-values calculated from linear models for microarray and OMICS data (limma, R package ver 3.64.3). The core analysis module was used with the module’s default settings: murine species, p-value, and fold change filter of |log₂FC|. Regulator effects networks were generated using p-value cutoff of 0.05, z-score cutoff of 2.0, and maximum 10 regulators and 10 functions per network. They were then filtered for HMOX1.

**REFERENCES**

1 Park, S. H. *et al.* IL-13 and IL-17A induced pulmonary-hypertension-phenotype due to inhalation of antigen and fine particles from air pollution. *Pulmonary circulation* **4**, 654-668 (2014). <https://doi.org/10.1086/678511>.

2 Grunig, G. *et al.* Perspective: ambient air pollution: inflammatory response and effects on the lung’s vasculature. *Pulmonary circulation* **4**, 25-35 (2014).

3 Park, S. H. *et al.* The effects of antigen-specific IgG1 antibody for the pulmonary-hypertension-phenotype and B cells for inflammation in mice exposed to antigen and fine particles from air pollution. *PLoS One* **10**, e0129910 (2015).

4 Caraher, E. J. *et al.* Receptor for advanced glycation end-products and World Trade Center particulate induced lung function loss: A case-cohort study and murine model of acute particulate exposure. *PLoS One* **12**, e0184331 (2017). <https://doi.org/10.1371/journal.pone.0184331>

5 Nolan, A., Weiden, M. D., Thurston, G. & Gold, J. A. Vascular endothelial growth factor blockade reduces plasma cytokines in a murine model of polymicrobial sepsis. *Inflammation* **28**, 271-278 (2004). <https://doi.org/10.1007/s10753-004-6050-3>

6 Yen, L. F., Wei, V. C., Kuo, E. Y. & Lai, T. W. Distinct patterns of cerebral extravasation by Evans blue and sodium fluorescein in rats. *PLoS One* **8**, e68595 (2013). <https://doi.org/10.1371/journal.pone.0068595>

7 Kitzerow, O., Zucker, I. H., Lisco, S. J. & Wang, H. J. Timeline of Multi-Organ Plasma Extravasation After Bleomycin-Induced Acute Lung Injury. *Front Physiol* **13**, 777072 (2022). <https://doi.org/10.3389/fphys.2022.777072>

8 Aggarwal, C. C., Hinneburg, A. & Keim, D. A. On the surprising behavior of distance metrics in high dimensional space. *Lect Notes Comput Sc* **1973**, 420-434 (2001).

9 Josse, J. & Husson, F. missMDA: A Package for Handling Missing Values in Multivariate Data Analysis. *J Stat Softw* **70** (2016).
