# Supplementary material for: Lung Dysfunction and Systemic Inflammation: A Role for HO-1 and NLRP3 in a COVID-19 Murine Model
Source: Research Square preprint supplement (doi:10.21203/rs.3.rs-8844647/v1), 2026-03-17
Supplement: Supplementary file 2 [file 3f8d2db587e6df84df0600ec.docx]

**Supplemental Table 1**
